# Supplementary material for: Free-standing large, ultrathin germanium selenide van der Waals ribbons by combined vapor–liquid–solid growth and edge attachment
Source: Royal Society of Chemistry journal article supplement (doi:10.1039/d2nr00397j), 2022-01-01
Supplement: d2nr00397j1.pdf [file d2nr00397j1.pdf]

## Free-Standing Large, Ultrathin Germanium Selenide van der Waals Ribbons by Combined Vapor-Liquid-Solid Growth and Edge Attachment

Eli Sutter,<sup>1,2,\*</sup> Jacob S. French,<sup>3</sup> and Peter Sutter<sup>3</sup>

<sup>1</sup>*Department of Mechanical and Materials Engineering, University of Nebraska-Lincoln,  
Lincoln, NE 68588 (USA)*

<sup>2</sup>*Nebraska Center for Materials and Nanoscience, University of Nebraska-Lincoln,  
Lincoln, NE 68588 (USA)*

<sup>3</sup>*Department of Electrical and Computer Engineering, University of Nebraska-Lincoln,  
Lincoln, NE 68588 (USA)*

### Supporting Figures

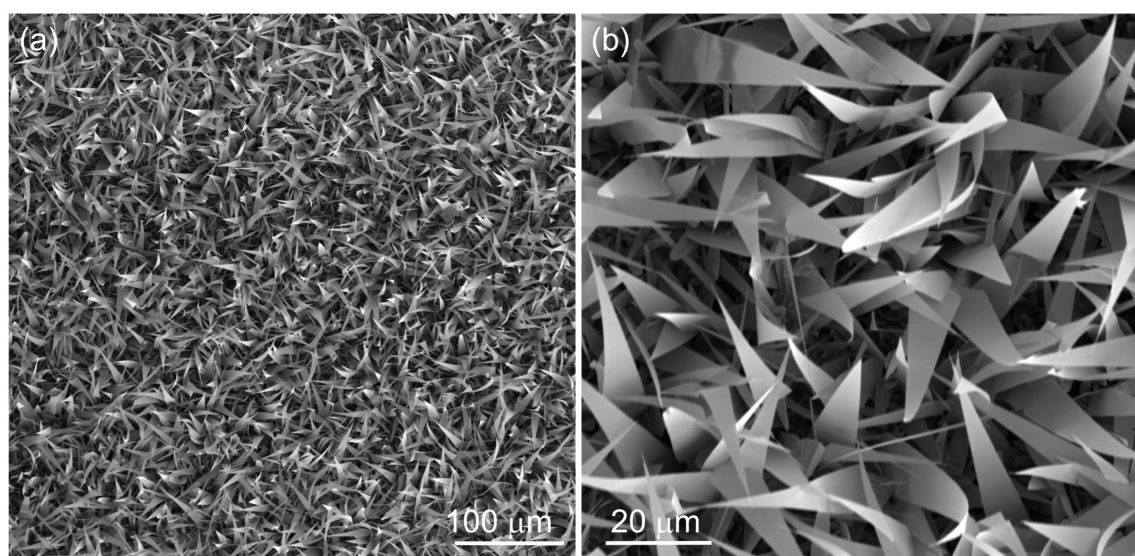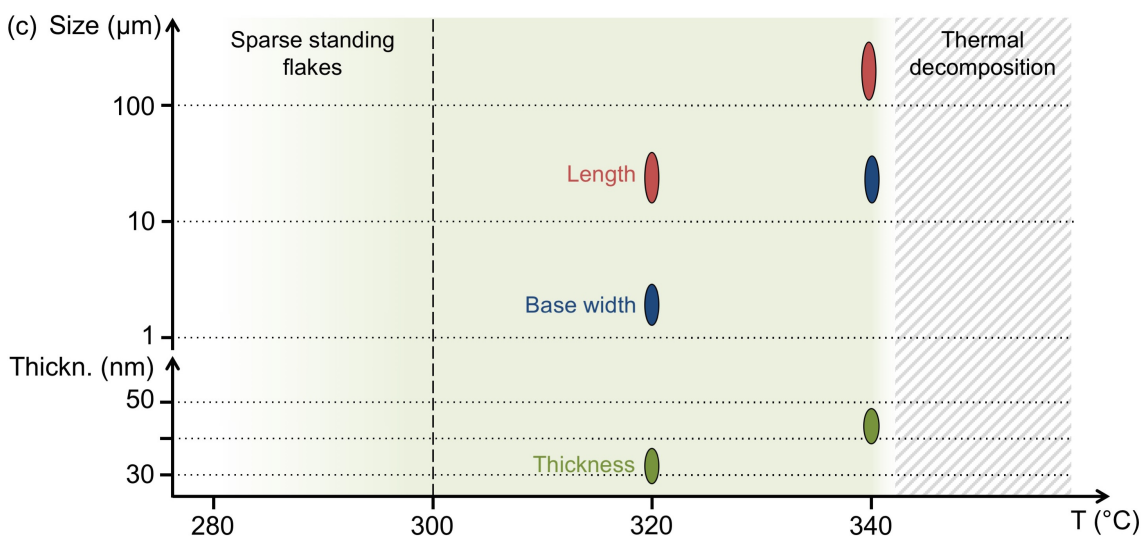

**Figure S1. Morphology of GeSe nanoribbons.** (a) SEM of Au-catalyzed GeSe nanoribbons on the Au/Si growth substrate. (b) Higher magnification SEM image of the GeSe ribbons. (c) Trends of thickness, base width, and length of the GeSe ribbons as a function of growth temperature.

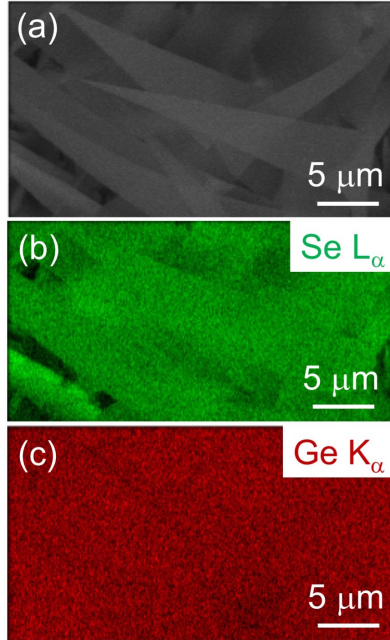

**Figure S2.** (a) SEM of Au-catalyzed GeSe nanoribbons on the Si growth substrate. (b) EDS chemical maps showing the distribution of Ge and Se on the growth substrate.

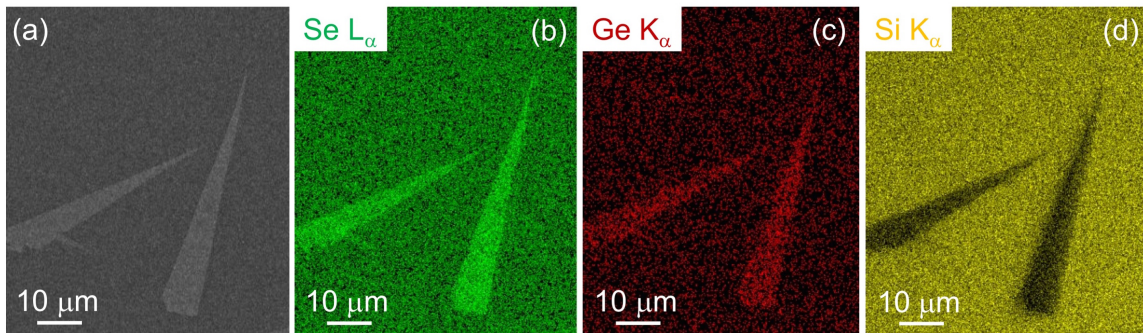

**Figure S3.** (a) SEM of Au-catalyzed GeSe nanoribbons transferred to SiN<sub>x</sub>/Si support. (b) – (d) EDS chemical maps showing the distribution of Ge, Se in the nanoribbons and Si stemming from the support.

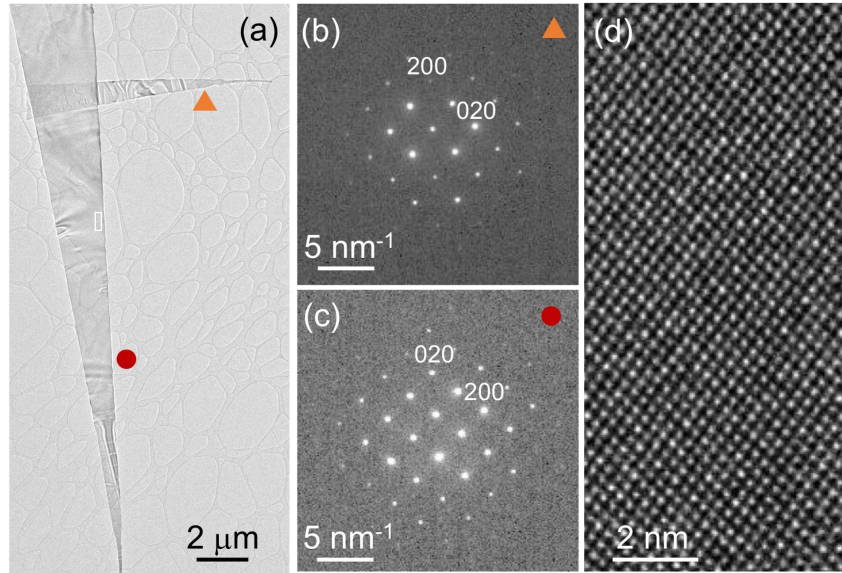

**Figure S4. Electron microscopy and diffraction of GeSe ribbons.** (a) TEM image of characteristic GeSe nanoribbons on amorphous carbon film (Growth temperature: 320°C). (b), (c) Nanobeam electron diffraction of of the two nanoribbons in (a). (d) High-resolution TEM image of a GeSe ribbon at the position marked with the white box in (a).

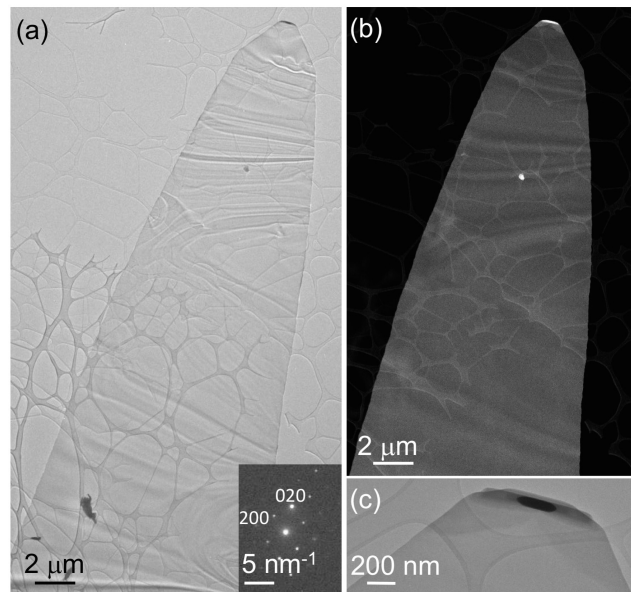

**Figure S5. Morphology of GeSe ribbons.** (a) TEM image of a characteristic GeSe nanoribbon on amorphous carbon film (Growth temperature: 340°C, growth substrate Au/Si). Inset: Nanobeam electron diffraction of of the ribbon along the [001] zone axis. (b) HAADF-STEM image of the nanoribbon in (a). (c) Higher magnification TEM image of the tip of the GeSe ribbon.



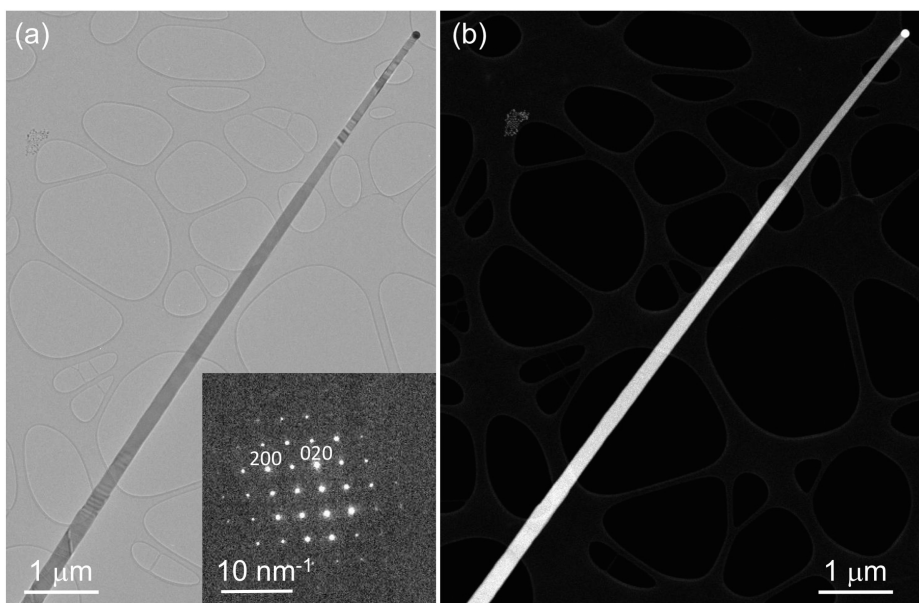

**Figure S6. Morphology of GeSe ribbons grown with Au catalyst on graphite.** (a) TEM image of a characteristic GeSe nanoribbon on amorphous carbon film (Growth temperature: 340°C, growth substrate Au/graphite). Inset: Nanobeam electron diffraction of the ribbon along the [001] zone axis. (b) HAADF-STEM image of the nanoribbon in (a).

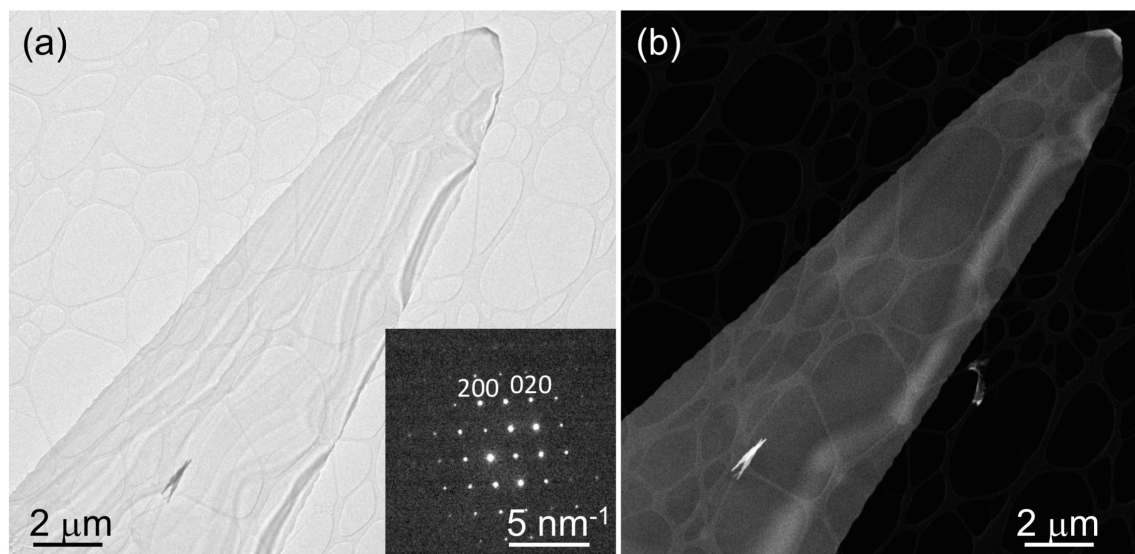

**Figure S7. Morphology of GeSe ribbons grown with Au catalyst on graphite.** (a) TEM image of a characteristic GeSe nanoribbon on amorphous carbon film (Growth temperature: 340°C, growth substrate Au/graphite). Inset: Nanobeam electron diffraction of the ribbon viewed along the [001] zone axis. (b) HAADF-STEM image of the nanoribbon in (a).

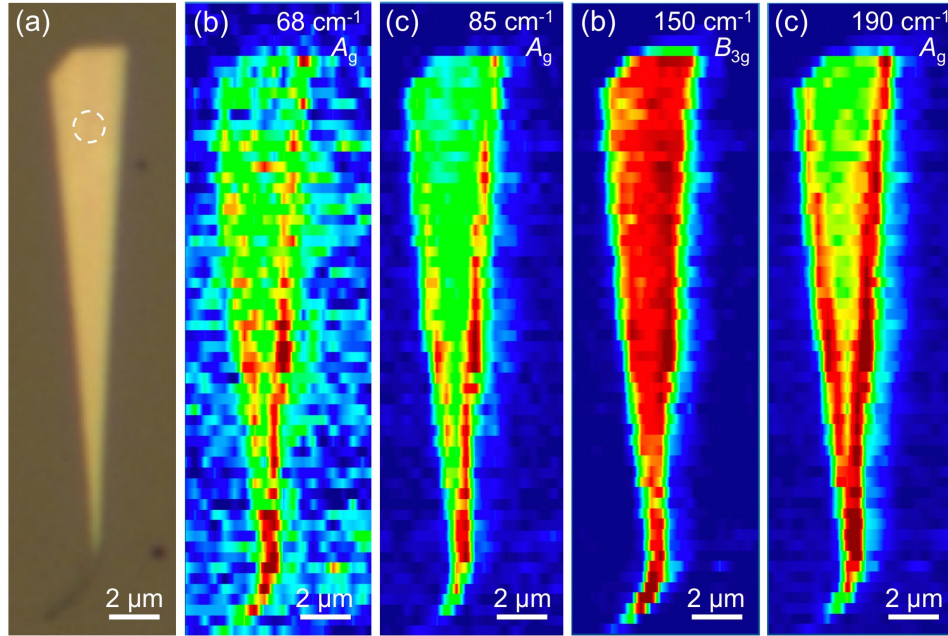

**Figure S8. Raman spectroscopy of GeSe nanoribbons.** (a) Optical microscopy image of a GeSe nanoribbon grown at 320°C. (b) – (c) Micro-Raman intensity maps of the  $A_g$  and  $B_{3g}$  Raman modes of GeSe.

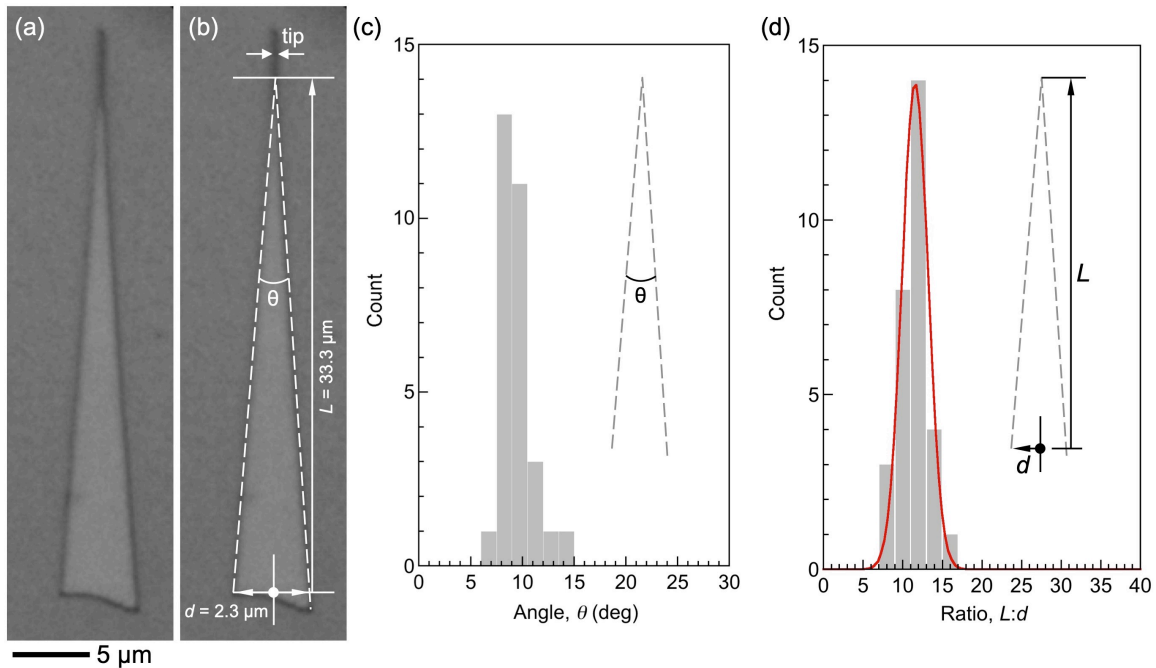

**Figure S9. Analysis of the tapered shape of GeSe nanoribbons.** (a) Optical microscopy image of a GeSe nanoribbon grown at 320°C (transferred to  $\text{SiN}_x$  chip). (b) Measurements of the half-width at the base ( $d$ ) and length ( $L$ ) of the ribbon segment, along with the opening angle ( $\theta$ ). Here,  $d = 2.3 \mu\text{m}$  and  $L = 33.3 \mu\text{m}$ , so that  $\theta = 2 \cdot \arctan(d/L) = 7.9^\circ$ . (c) Histogram of the distribution of opening angles  $\theta$  for an ensemble of 30 nanoribbons supported on a flat  $\text{SiN}_x$  chip. (d) Histogram of the ratio between length and base half-width, showing  $L:d = (11.5 \pm 1.8)$ .

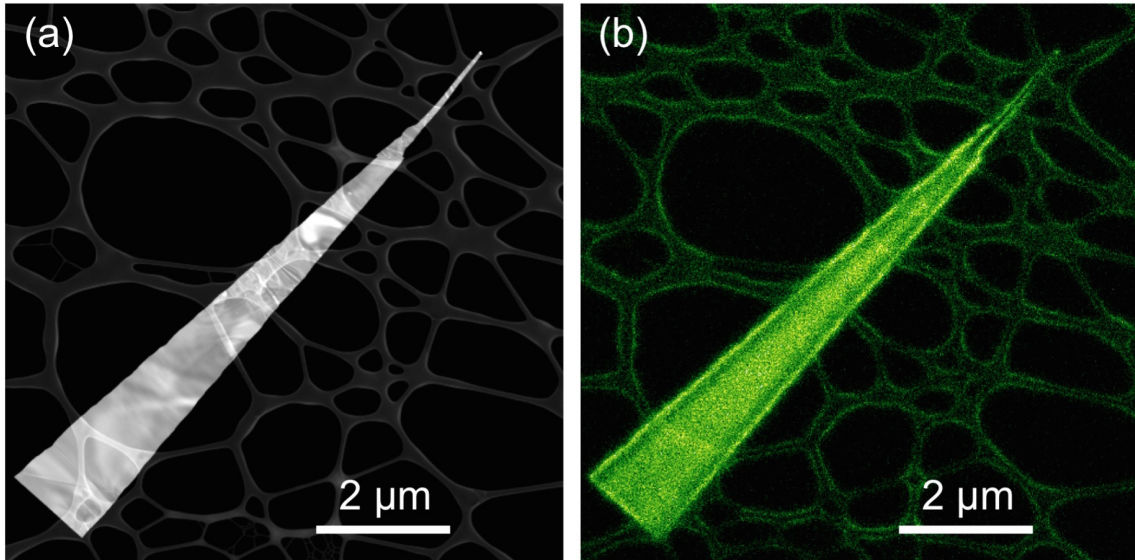

**Figure S10. Cathodoluminescence spectroscopy of individual GeSe nanoribbons. (a)** HAADF-STEM image of a typical GeSe nanoribbon. **(b)** Panchromatic CL map of the GeSe nanoribbon.

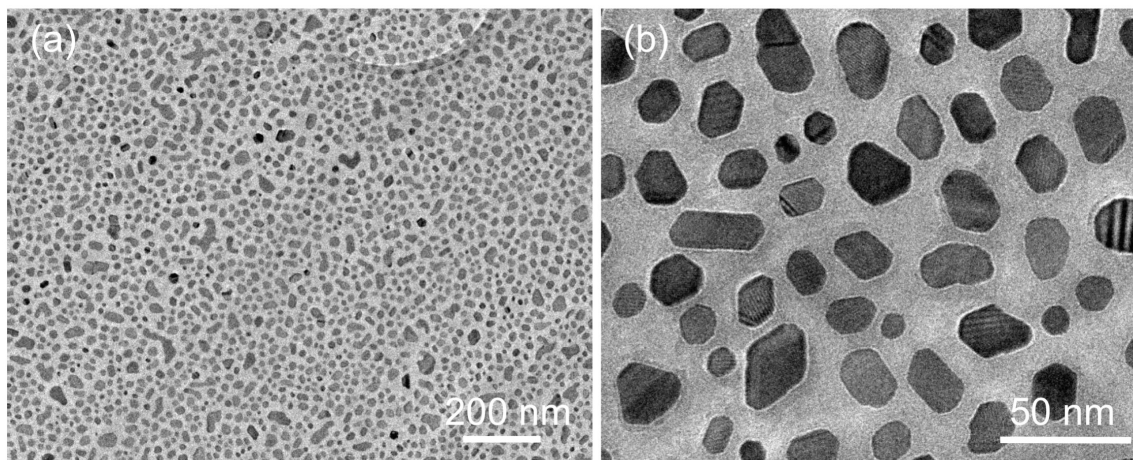

**Figure S11.** (a) – (b) Transmission electron microscopy images of Au film deposited on graphite by sputtering, following dewetting at the growth temperature of 340°C.

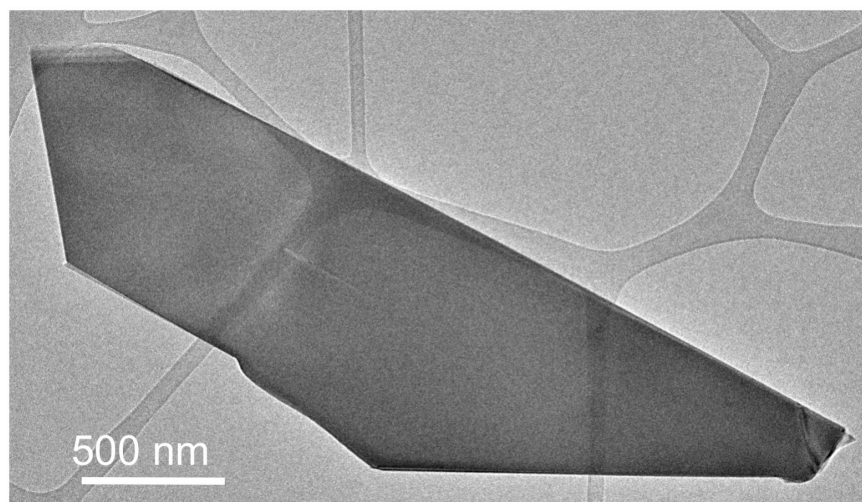

**Figure S12.** Transmission electron microscopy image of a typical GeSe flake grown on Si substrate without deposited Au at a growth temperature of 340°C. The flake, transferred to lacey carbon film for the TEM imaging, shows a typical irregular shape with a long, straight edge that likely represents its interface where it broke off the Si growth substrate.
